# Supplementary material
Source: MDPI journal article supplement (https://www.mdpi.com/1996-1073/14/21/7429)
Supplement: s1 [file s1 › energies-1410740-supplementary.pdf]

## **Supporting Information (SI)**

# **Delamination-Free In-Air and Underwater Oil-Repellent Filters for Oil-Water Separation: Gravity-Driven and Cross-Flow Operations**

*Bishwash Shrestha<sup>†</sup>, Mohammadamin Ezazi<sup>†</sup>, Gibum Kwon \**

Department of Mechanical Engineering, University of Kansas, Lawrence, Kansas 66045, United States.

\*Email: [gbkwon@ku.edu](mailto:gbkwon@ku.edu)

<sup>†</sup> indicating equal contributions

### Section S1. Fourier-transform infrared (FT-IR) spectroscopy analysis of F-PEGDA.

To verify the chemical structure of F-PEGDA, the FT-IR analysis was conducted using a Perkin Elmer Spectrum 400 Spectrometer. The FT-IR spectra were recorded at a resolution of  $4\text{ cm}^{-1}$  for 16 scans. **Fig. S1** demonstrates the survey spectra of F-PEGDA prepared with varied compositions of F-acrylate. Peaks appearing at  $\approx 1205\text{ cm}^{-1}$  and  $1149\text{ cm}^{-1}$  (pink shade) confirm the presence of fluorine moieties ( $-\text{CF}_2$ ) [1]. The fluorine moieties are critical for lowering the overall solid surface free energy. Note that these peaks become more prominent as the F-acrylate concentration increases in the F-PEGDA. Peaks corresponding to hydroxyl group ( $-\text{OH}$ ,  $948\text{ cm}^{-1}$ , blue shade) and carbonyl group ( $-\text{CO}$ ,  $1440\text{--}1395\text{ cm}^{-1}$  and  $1720\text{ cm}^{-1}$ , green shades) are also shown in FT-IR spectra [2, 3].

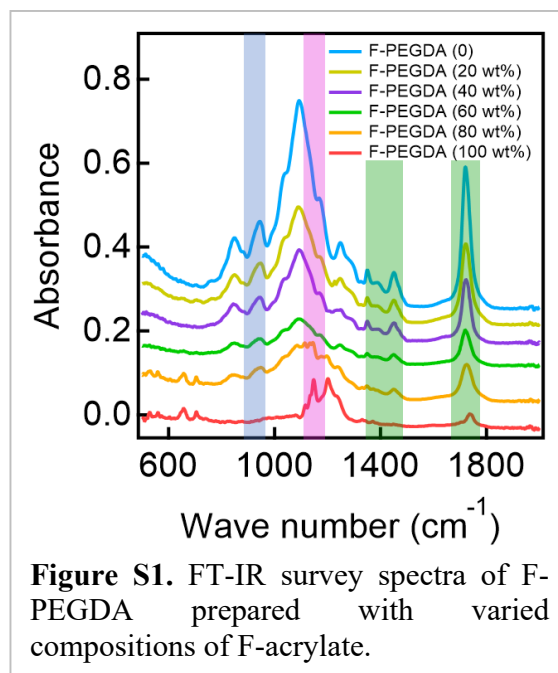

### Section S2. Effect of F-PEGDA solution viscosity on the pore size of a filter.

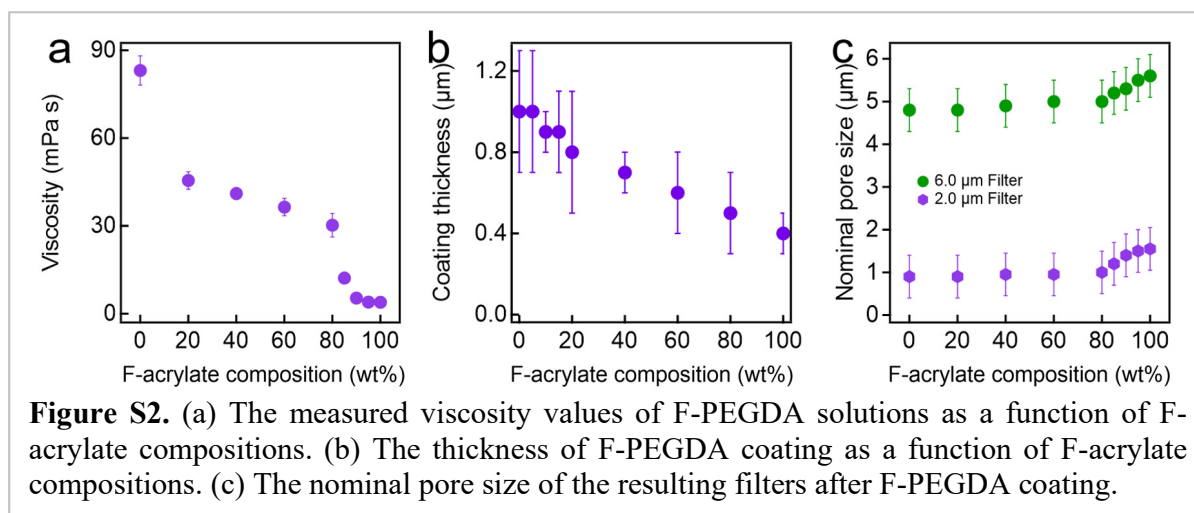

**Fig. S2a** demonstrates a plot of the viscosity as a function of F-acrylate composition in the F-PEGDA solution. The viscosity of the solution increases with a decrease in the F-acrylate

composition. We attribute this to a higher viscosity value of PEGDA in comparison to F-acrylate. We also found that an F-PEGDA coating solution with higher viscosity results in a coating with a higher thickness (**Fig. S2b**). As a consequence, the effective pore size of a filter is also affected by the coating solution viscosity. **Fig. S2c** shows that as F-acrylate composition decreases in the F-PEGDA coating solution, the nominal pore size of the resulting filter decreases as well. Based on these measurements, we anticipate that our F-PEGDA coating can be applied to a filter with a pore size of  $\approx 1 \mu\text{m}$  or greater without resulting in a complete pore-clogging.

### Section S3. Initial contact angles and Time of Wetting values for water on F-PEGDA surfaces.

When our F-PEGDA surface is subjected to water, it reconfigures by enabling the hydrophilic moieties (e.g., -OH groups) to emerge on the surface. This is a kinetic process that is manifested by the so-called Time of Wetting (ToW, see also main text). On our F-PEGDA surfaces, a sessile water droplet exhibits a finite initial contact angle upon being placed. Then, it gradually wets the surface. **Table S1** lists the measured initial contact angle values for water on F-PEGDA surfaces.

**Fig. S3** shows the measured ToW values. It should be noted that a water droplet shows a final contact angle of  $25^\circ \pm 3^\circ$  on the F-PEGDA (80 wt%) surface (also see

**Fig. 1c** in main text). We determined the final contact angle when it remains unchanged ( $< 2^\circ$ ) for 10 mins.

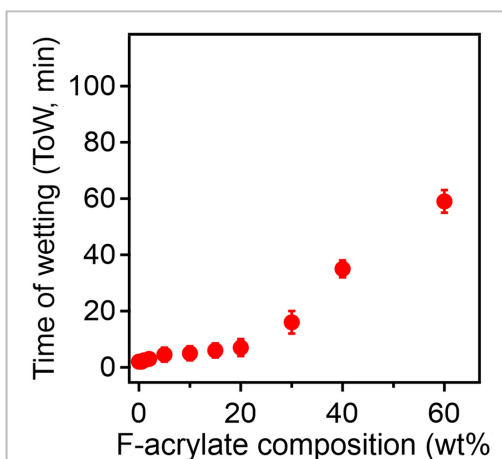

**Figure S3.** The measured ToW values for a sessile water droplet on the F-PEGDA surfaces with varying F-Acrylate compositions.

**Table S1.** The measured initial contact angles for a sessile water droplet (5  $\mu\text{l}$ ) on F-PEGDA surfaces with varying F-Acrylate compositions.

| Surface          | $\theta_{\text{water},adv}^*(t=0)$ | $\theta_{\text{water},rec}^*(t=0)$ |
|------------------|------------------------------------|------------------------------------|
| F-PEGDA (0)      | $43^\circ \pm 3^\circ$             | $0^\circ$                          |
| F-PEGDA (5 wt%)  | $62^\circ \pm 2^\circ$             | $0^\circ$                          |
| F-PEGDA (10 wt%) | $75^\circ \pm 3^\circ$             | $0^\circ$                          |

|                  |                             |                            |
|------------------|-----------------------------|----------------------------|
| F-PEGDA (15 wt%) | $82^{\circ} \pm 2^{\circ}$  | $0^{\circ}$                |
| F-PEGDA (20 wt%) | $89^{\circ} \pm 4^{\circ}$  | $0^{\circ}$                |
| F-PEGDA (40 wt%) | $95^{\circ} \pm 5^{\circ}$  | $15^{\circ} \pm 4^{\circ}$ |
| F-PEGDA (60 wt%) | $102^{\circ} \pm 2^{\circ}$ | $25^{\circ} \pm 3^{\circ}$ |
| F-PEGDA (80 wt%) | $110^{\circ} \pm 3^{\circ}$ | $49^{\circ} \pm 4^{\circ}$ |

#### Section S4. Calculation of the solid surface energy of F-PEGDA surfaces.

We have utilized the Owens and Wendt approach [4] to calculate the solid surface energy ( $\gamma_{sv}$ ) of F-PEGDA surfaces with varying F-acrylate compositions. Note that we fabricated a smooth surface of F-PEGDA by spincoating. Two probe liquids, n-hexadecane ( $\gamma_{lv}=27.5$  mN/m) and water ( $\gamma_{lv}^d=21.1$  mN/m and  $\gamma_{lv}^p=51.0$  mN/m) were used as a non-polar liquid and a polar liquid, respectively. **Table S2** lists the calculated solids surface energy values of F-PEGDA surfaces with varying F-acrylate compositions.

**Table S2.** The calculated solid surface energy values of F-PEGDA surfaces.

| Surface          | $\gamma_{sv}^p$ (mN m <sup>-1</sup> ) | $\gamma_{sv}^d$ (mN m <sup>-1</sup> ) | $\gamma_{sv}$ (mN m <sup>-1</sup> ) |
|------------------|---------------------------------------|---------------------------------------|-------------------------------------|
| F-PEGDA (0)      | 39.5                                  | 35.2                                  | 74.7                                |
| F-PEGDA (5 wt%)  | 24.6                                  | 15.3                                  | 39.9                                |
| F-PEGDA (10 wt%) | 13.8                                  | 13.2                                  | 27.0                                |
| F-PEGDA (15 wt%) | 6.2                                   | 11.2                                  | 17.4                                |
| F-PEGDA (20 wt%) | 3.1                                   | 10.1                                  | 13.2                                |
| F-PEGDA (40 wt%) | 0.9                                   | 9.9                                   | 10.8                                |
| F-PEGDA (60 wt%) | 0.5                                   | 9.9                                   | 10.4                                |
| F-PEGDA (80 wt%) | 0.5                                   | 9.9                                   | 10.4                                |

**Section S5. Apparent contact angles for water and oil on F-PEGDA coated filter with 2.0  $\mu\text{m}$  of inherent pore size.**

**Fig. S4** demonstrates plots of advancing and receding apparent contact angles of DI water and oil (n-hexadecane) on a filter with 2.0  $\mu\text{m}$  of inherent pore size that was coated with F-PEGDA with varied F-acrylate compositions. Similar to the results for the 6.0  $\mu\text{m}$  filter (see **Fig. 1c** in main text), the apparent contact angles of oil increase with an increase in the composition of F-acrylate. At 20 wt.% of F-acrylate composition, the advancing ( $\theta^*_{\text{oil, adv}}$ ) and receding ( $\theta^*_{\text{oil, rec}}$ ) apparent contact angles for oil were measured as  $135^\circ \pm 3^\circ$  and  $111^\circ \pm 3^\circ$ , respectively, while those for water remained zero ( $\theta^*_{\text{water, adv}} = 0^\circ$  and  $\theta^*_{\text{water, rec}} = 0^\circ$ ). When the F-acrylate composition becomes 80 wt.% in F-PEGDA coating, the value of  $\theta^*_{\text{water, adv}}$  is measured as  $18^\circ \pm 3^\circ$ .

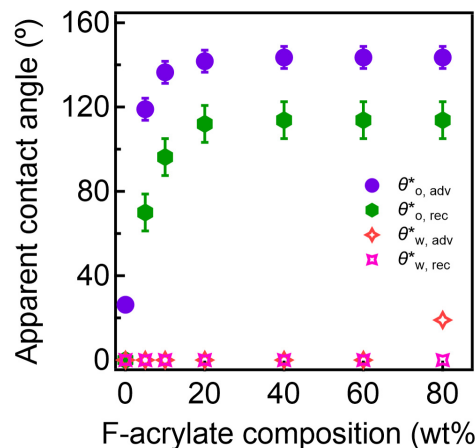

**Figure S4.** Advancing and receding apparent contact angles for water and oil (n-hexadecane) on F-PEGDA surface with varied compositions of F-acrylate for the filter with 2.0  $\mu\text{m}$  of inherent nominal pore size.

**Section S6. Apparent contact angles for oil on a filter submerged in water.**

**Fig. S5** demonstrates a plot of advancing and receding apparent contact angles for oil (n-hexadecane) on filters coated with F-PEGDA with various F-acrylate compositions submerged in DI water. The results show that the filters coated with F-PEGDA exhibited very high underwater apparent oil contact angles (i.e., underwater superoleophobic wettability). Further, a filter coated with F-PEGDA with a lower F-acrylate composition exhibits a higher underwater oil contact angle. For example, a filter coated with F-PEGDA (20 wt.%) exhibited contact angles of  $\theta^*_{\text{oil, adv (under water)}} = 169^\circ \pm 2^\circ$  and  $\theta^*_{\text{oil, rec}}$

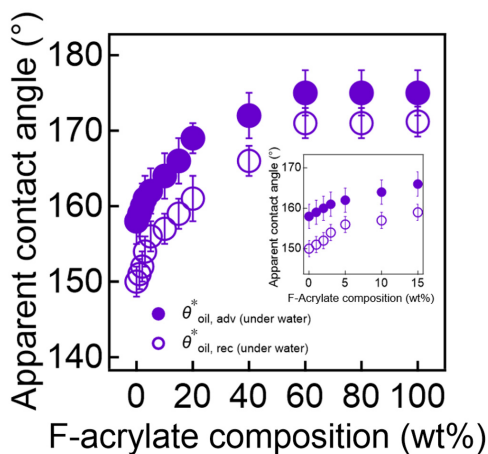

**Figure S5.** Underwater advancing and receding apparent contact angles of oil (n-hexadecane) on F-PEGDA coatings prepared with varied F-acrylate compositions.

(under water) =  $161^{\circ} \pm 3^{\circ}$ , whereas the one coated with F-PEGDA (80 wt.%) exhibited  $\theta_{\text{oil, adv (under water)}}^{*} = 174^{\circ} \pm 3^{\circ}$  and  $\theta_{\text{oil, rec (under water)}}^{*} = 171^{\circ} \pm 2^{\circ}$ .

#### Section S7. Measurements of water uptake by F-PEGDA coated filters.

The measurement of the water uptake by F-PEGDA coated filters is conducted by submerging the filter (2.5 cm  $\times$  2.5 cm) into a water bath (250 mL) for 1 hour. We measured the weight of the filter after 1 hour and compared it with that of the dry (i.e., as-prepared) one. **Table S3** lists the measured weights of filters. The water uptake is calculated by subtracting the weight of an as-prepared filter from that of the wet filter.

**Table S3.** The measured weight values of F-PEGDA (20 wt%) coated filters and calculated water uptake.

| Filter            | Dry filter (mg) | Wet filter (mg) | Water uptake (mg) |
|-------------------|-----------------|-----------------|-------------------|
| 6.0 $\mu\text{m}$ | 160             | 365             | 205               |
| 2.0 $\mu\text{m}$ | 162             | 381             | 219               |

#### Section S8. Delamination of F-PEGDA coating from a filter without MEMO grafting.

Grafting MEMO to a filter surface can prevent the delamination of F-PEGDA coating. **Fig. S6a** and **S6b** show SEM images with the EDS data (e.g., elemental mapping) of a filter coated with F-PEGDA (20 wt.%) without MEMO grafting

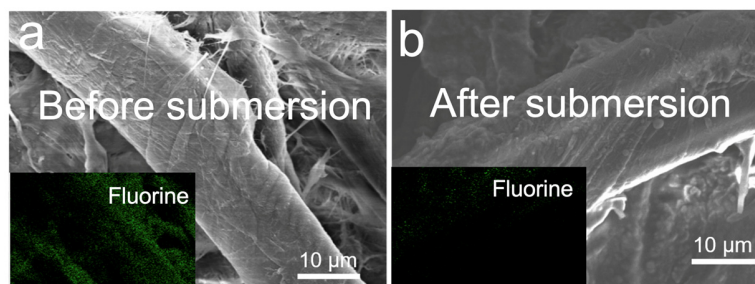

**Figure S6.** (a-b) SEM images and the EDS data (elemental mapping) showing a filter surface coated with F-PEGDA without MEMO before (a) and after submersion in water for 1 hour (b).

before and after submersion in water for 1 hour, respectively. The results show that the Fluorine (F) element nearly disappeared after 1 hour of submersion, indicating that the F-PEGDA coating is delaminated (see **Fig. S6b**).

### Section S9. Size distribution of the dispersed phases in oil-water emulsions.

Dynamic light scattering (DLS) was utilized to determine the size distribution of the dispersed phases in oil-water emulsions. **Fig. S7a** and **S7b** show that the average size of the oil droplets dispersed in water is  $\approx 19 \mu\text{m}$ , whereas the average size of the water droplets dispersed in the oil phase is  $\approx 16 \mu\text{m}$ .

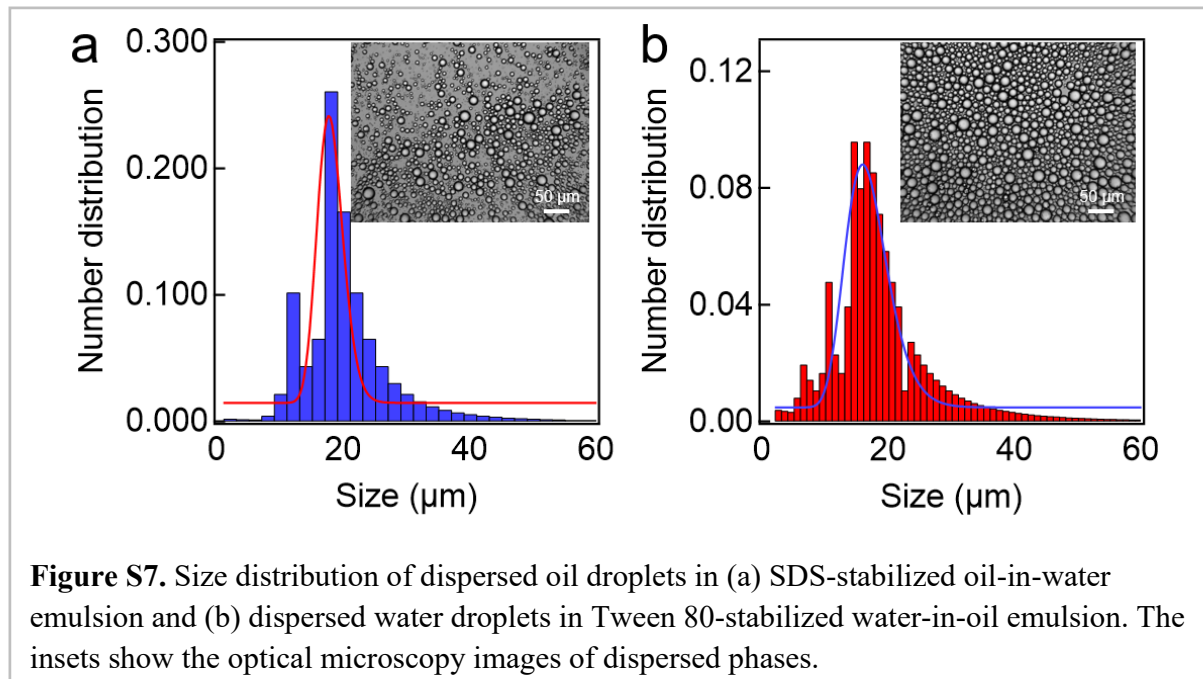

### Section S10. TGA data for permeates from continuous separation of oil-water emulsion by cross-flow apparatus.

We determined the separation efficiency by using PerkinElmer PYRIS 1 thermogravimetric analysis (TGA). About 50 mg of a sample was heated from room temperature to  $105^\circ\text{C}$  at a rate of  $5^\circ\text{C min}^{-1}$ . The temperature was held constant at  $105^\circ\text{C}$  for 60 minutes. **Fig. S8** shows the TGA plots of the water-rich permeates through the filters with  $2.0 \mu\text{m}$  and  $6.0 \mu\text{m}$  of inherent nominal pore size coated with F-PEGDA (20 wt.%) after continuous separation of oil-in-water emulsion using a cross-flow cell. It is observed that a  $2.0 \mu\text{m}$  pore size filter was able to separate oil and water

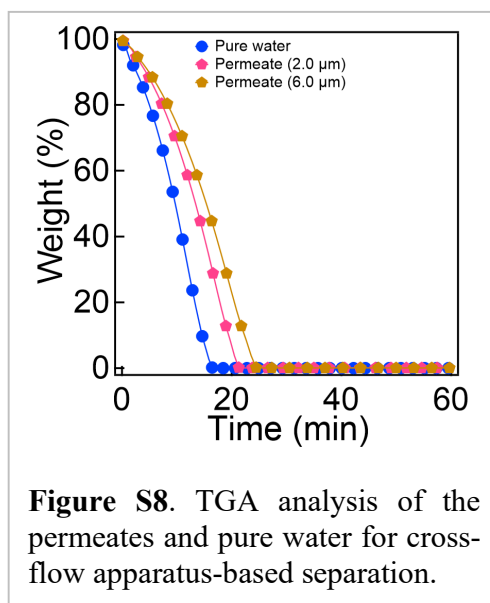

at the high efficiency of  $\approx 98\%$ , while the one with a  $6.0\ \mu\text{m}$  of pore size demonstrated a separation efficiency of  $\approx 96\%$ .

#### Section S11. The measured flux values of continuous separation of oil-in-water emulsion.

**Fig. S9** shows the measured flux values for the water-rich permeates during the continuous separation of oil-in-water emulsion utilizing F-PEGDA (20wt%) coated filters. The results show that the flux values were maintained at  $204 \pm 4\ \text{L m}^{-2}\ \text{h}^{-1}$  ( $6.0\ \mu\text{m}$  filter) and  $172 \pm 5\ \text{L m}^{-2}\ \text{h}^{-1}$  ( $2.0\ \mu\text{m}$  filter) over 50 hours of continuous separation.

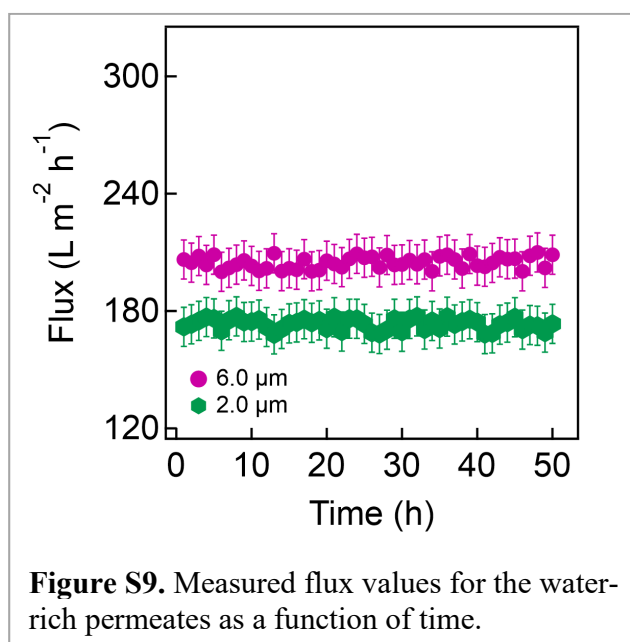

**Figure S9.** Measured flux values for the water-rich permeates as a function of time.

#### References

1. Kumar, V.; Pulpytel, J.; Mannelli, I.; Rossi, F.; Rauscher, H.; Arefi-Khonsari, F. In *Low surface energy fluorocarbon coatings via plasma polymerization process: process optimization and protein repellent study*, International Symposium on Plasma Chemistry, 2009; 2009.
2. Browning, M.; Cereceres, S.; Luong, P.; Cosgriff-Hernandez, E., Determination of the in vivo degradation mechanism of PEGDA hydrogels. *Journal of Biomedical Materials Research Part A* **2014**, 102, (12), 4244-4251.
3. Zhang, X.; Yang, D.; Nie, J., Chitosan/polyethylene glycol diacrylate films as potential wound dressing material. *International journal of biological macromolecules* **2008**, 43, (5), 456-462.
4. Owens, D. K.; Wendt, R., Estimation of the surface free energy of polymers. *Journal of applied polymer science* **1969**, 13, (8), 1741-1747.
